# Supplementary material for: A transcriptome-wide association study identifies PALMD as a susceptibility gene for calcific aortic valve stenosis
Source: PubMed Central journal article supplement (PMC5840407; doi:10.1038/s41467-018-03260-6), 2018-03-07
Supplement: 41467_2018_3260_MOESM1_ESM.pdf [file 41467_2018_3260_MOESM1_ESM.pdf]

## Supplementary Information

A transcriptome-wide association study identifies *PALMD* as a susceptibility gene for calcific aortic valve stenosis

Thériault et al.

**Supplementary Table 1.** Top GWAS results showing eight loci with at least one SNP with  $P_{GWAS} < 1 \times 10^{-6}$ 

| SNP         | Locus   | Risk allele | Alt. allele | MAF cases | MAF controls | $P_{GWAS}$ | Variant annotation | Closest gene                                     | eQTL gene ( $P_{eQTL}$ )*                               |
|-------------|---------|-------------|-------------|-----------|--------------|------------|--------------------|--------------------------------------------------|---------------------------------------------------------|
| rs116126498 | 4q32.2  | T           | C           | 0.041     | 0.017        | 1.35E-07   | intergenic         | <i>FSTL5</i> ,<br><i>MIR4454</i>                 | None                                                    |
| rs954136    | 10q26.2 | G           | T           | 0.909     | 0.947        | 6.54E-07   | intergenic         | <i>DOCK1</i> , <i>NPS</i>                        | <i>MKI67</i><br>(0.045)                                 |
| rs146580537 | 13q13.3 | G           | T           | 0.005     | 0.017        | 6.96E-07   | intergenic         | <i>FREM2</i> ,<br><i>STOML3</i>                  | None                                                    |
| rs62280707  | 3q22.3  | A           | G           | 0.051     | 0.084        | 8.60E-07   | intergenic         | <i>FAIM</i> ,<br><i>PIK3CB</i> ,<br><i>CEP70</i> | <i>FAIM</i><br>(5.90E-05)<br><i>RBP2</i> (0.014)        |
| rs62382996  | 5q23.2  | G           | A           | 0.110     | 0.068        | 2.39E-06   | intronic           | <i>LOC100505841</i>                              | <i>SNX24</i><br>(0.012)                                 |
| rs141381550 | 14q12   | A           | G           | 0.010     | 0.028        | 2.42E-06   | intergenic         | <i>NUBPL</i> ,<br><i>ARHGAP5-AS1</i>             | None                                                    |
| rs148275869 | 4q22.2  | A           | C           | 0.037     | 0.016        | 2.56E-06   | intergenic         | <i>GRID2</i> , <i>ATOH1</i>                      | None                                                    |
| rs181762217 | 15q24.2 | A           | G           | 0.009     | 0.027        | 2.82E-06   | intronic           | <i>TMEM266</i>                                   | <i>MIR631</i><br>(0.023)<br><i>GOLGA6C/D</i><br>(0.032) |

\*Value eQTL-regulated gene ( $P_{eQTL}$ )

**Supplementary Table 2.** Effect of the 12 SNPs included in the Mendelian Randomization instrument on *PALMD* gene expression and CAVS risk.

| rsID        | Chr | BP        | Effect Allele | Effect Allele Freq | beta eQTL | SE eQTL | P eQTL    | beta GWAS Qc | SE GWAS Qc | P GWAS Qc | beta GWAS UKB | SE GWAS UKB | P GWAS UKB |
|-------------|-----|-----------|---------------|--------------------|-----------|---------|-----------|--------------|------------|-----------|---------------|-------------|------------|
| rs75131533  | 1   | 99931023  | A             | 0.011              | 0.449     | 0.207   | 0.031     | -0.748       | 0.331      | 0.020     | 0.051         | 0.198       | 0.796      |
| rs115541361 | 1   | 99998481  | T             | 0.046              | 0.228     | 0.077   | 0.003     | 0.079        | 0.161      | 0.622     | -0.144        | 0.098       | 0.144      |
| rs144406489 | 1   | 100001138 | G             | 0.028              | 0.209     | 0.098   | 0.035     | -0.262       | 0.217      | 0.226     | -0.058        | 0.120       | 0.630      |
| rs6702619   | 1   | 100046246 | T             | 0.470              | 0.327     | 0.023   | 5.821E-33 | -0.253       | 0.063      | 6.119E-05 | -0.245        | 0.037       | 6.290E-11  |
| rs72721723  | 1   | 100050140 | G             | 0.010              | 0.478     | 0.179   | 0.008     | -0.481       | 0.328      | 0.137     | 0.132         | 0.172       | 0.446      |
| rs114323737 | 1   | 100065823 | G             | 0.021              | 0.390     | 0.161   | 0.016     | -0.200       | 0.242      | 0.406     | 0.039         | 0.115       | 0.732      |
| rs115400609 | 1   | 100093163 | G             | 0.021              | 0.239     | 0.102   | 0.019     | -0.034       | 0.227      | 0.881     | -0.127        | 0.115       | 0.271      |
| rs77673766  | 1   | 100108802 | G             | 0.011              | 0.570     | 0.206   | 0.006     | 0.027        | 0.322      | 0.932     | -0.178        | 0.191       | 0.350      |
| rs1416230   | 1   | 100133510 | C             | 0.377              | 0.081     | 0.035   | 0.022     | -0.016       | 0.066      | 0.802     | 0.023         | 0.038       | 0.544      |
| rs1012097   | 1   | 100196610 | T             | 0.104              | 0.135     | 0.054   | 0.014     | 0.033        | 0.104      | 0.751     | -0.133        | 0.066       | 0.046      |
| rs143673569 | 1   | 100266933 | A             | 0.012              | 0.919     | 0.356   | 0.010     | -0.191       | 0.472      | 0.686     | -0.100        | 0.156       | 0.520      |
| rs12121352  | 1   | 100276218 | A             | 0.022              | 0.261     | 0.092   | 0.005     | 0.412        | 0.223      | 0.062     | -0.118        | 0.129       | 0.362      |

CHR: chromosome, BP: position, Qc: QUEBEC-CAVS cohort, UKB: UK Biobank

**Supplementary Table 3.** Number of SNPs excluded at each quality control check.

| <b>Quality control parameters</b>         | <b>Total</b> |
|-------------------------------------------|--------------|
| Call rate                                 | 22,856       |
| Illumina GenCall                          | 0            |
| Hardy-Weinberg                            | 139          |
| Monomorphic or minor allele frequency     | 75,276       |
| Different call rate in cases and controls | 881          |
| Total unique SNPs excluded                | 99,152       |
| Total initial SNPs number                 | 713,014      |
| Total SNPs remaining                      | 613,862      |

**Supplementary Table 4.** Number of samples excluded at each quality control check.

| <b>Quality control parameters</b> | <b>Total</b> | <b>Cases</b> | <b>Controls</b> |
|-----------------------------------|--------------|--------------|-----------------|
| Illumina GenCall                  | 0            | 0            | 0               |
| Call rate                         | 8            | 5            | 3               |
| Heterozygosity rate               | 1            | 1            | 0               |
| Gender mismatch                   | 0            | 0            | 0               |
| Ethnicity                         | 4            | 1            | 3               |
| Duplicate and genetic relatedness | 31           | 17           | 14              |
| Total unique samples excluded     | 44           | 24           | 20              |
| Total initial number of samples   | 2,070        | 1,033        | 1,037           |
| Total samples remaining           | 2,026        | 1,009        | 1,017           |

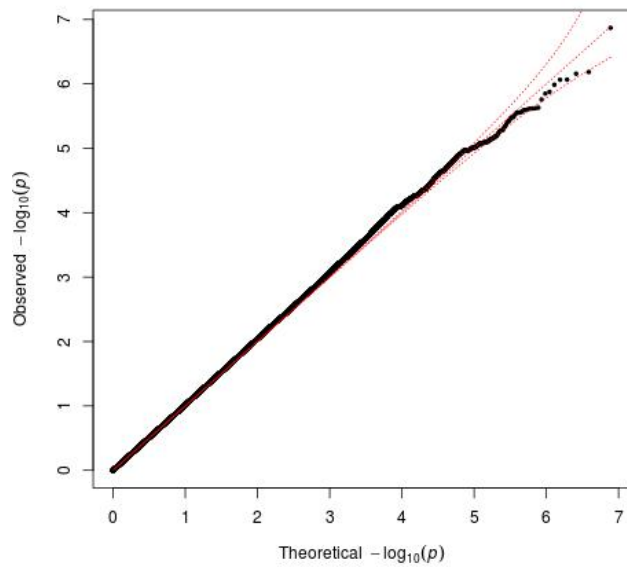

**Supplementary Figure 1.** Quantile-quantile plot of test statistics generated by the GWAS in 1,009 cases and 1,017 controls including 7,732,680 SNPs.

**Supplementary Figure 2.** Regional plots showing eight loci with at least one  $P_{GWAS} < 1 \times 10^{-6}$ . The y axis shows the  $P$  values in  $-\log_{10}$  scale for SNPs up- and downstream of the sentinel SNP (purple dot). The extent of linkage disequilibrium (LD;  $r^2$  values) for all SNPs with the sentinel SNP is indicated by colors. The location of genes is shown at the bottom. SNPs are plotted based on their chromosomal position on build hg19.

a) 4q32.2

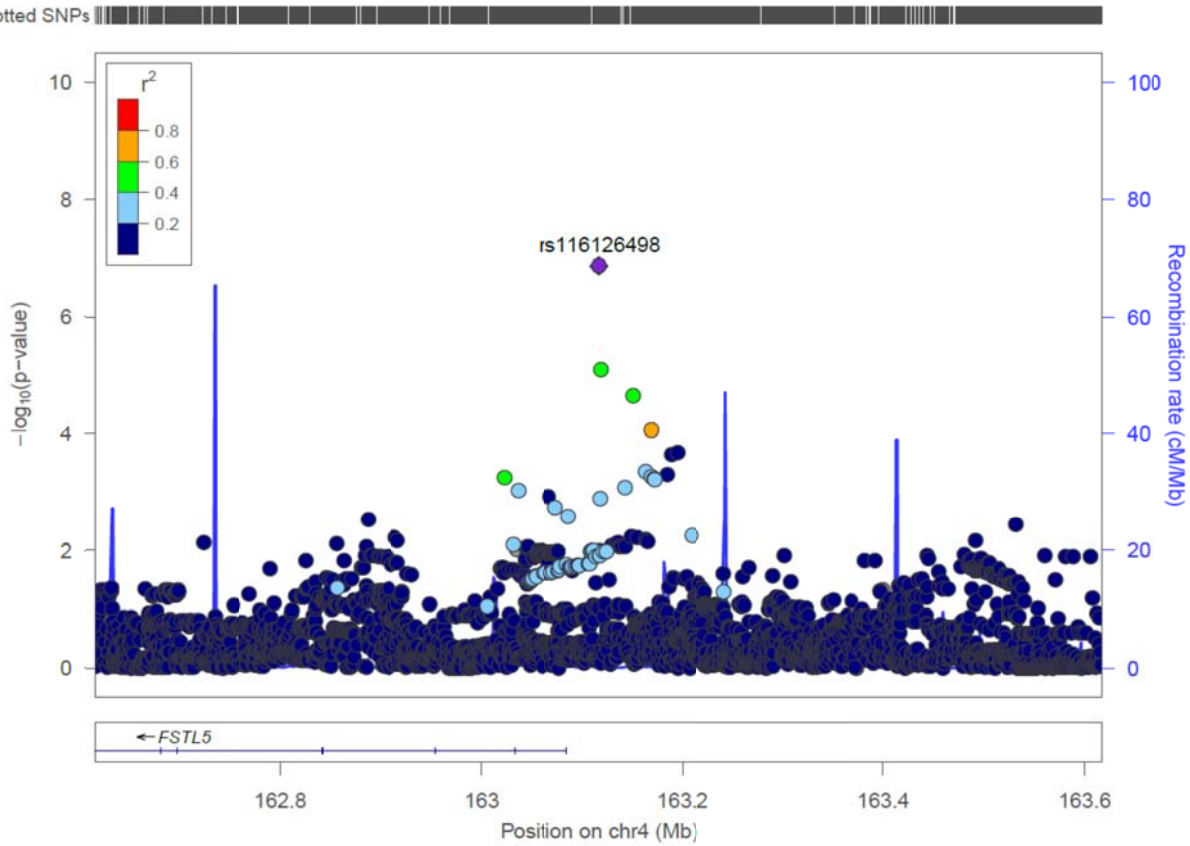

## b) 10q26.2

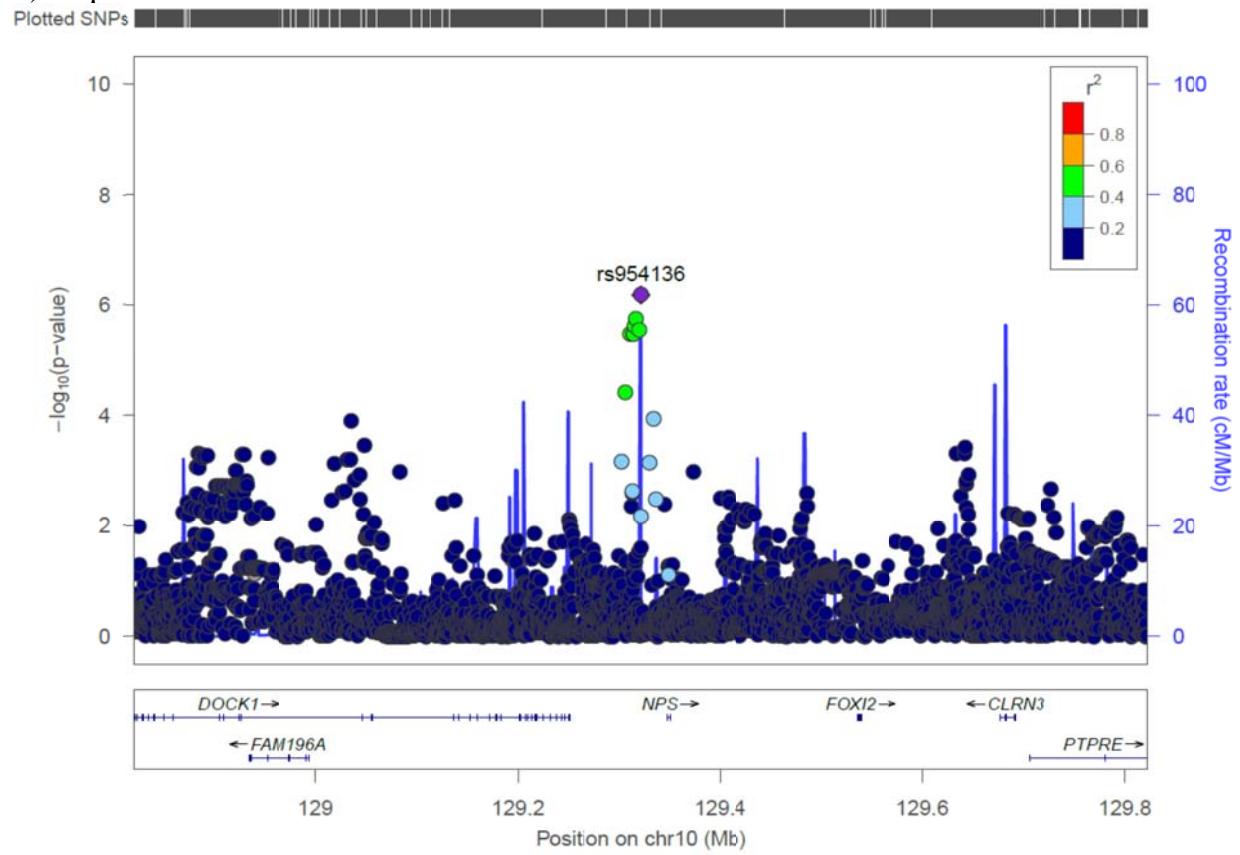



## c) 13q13.3

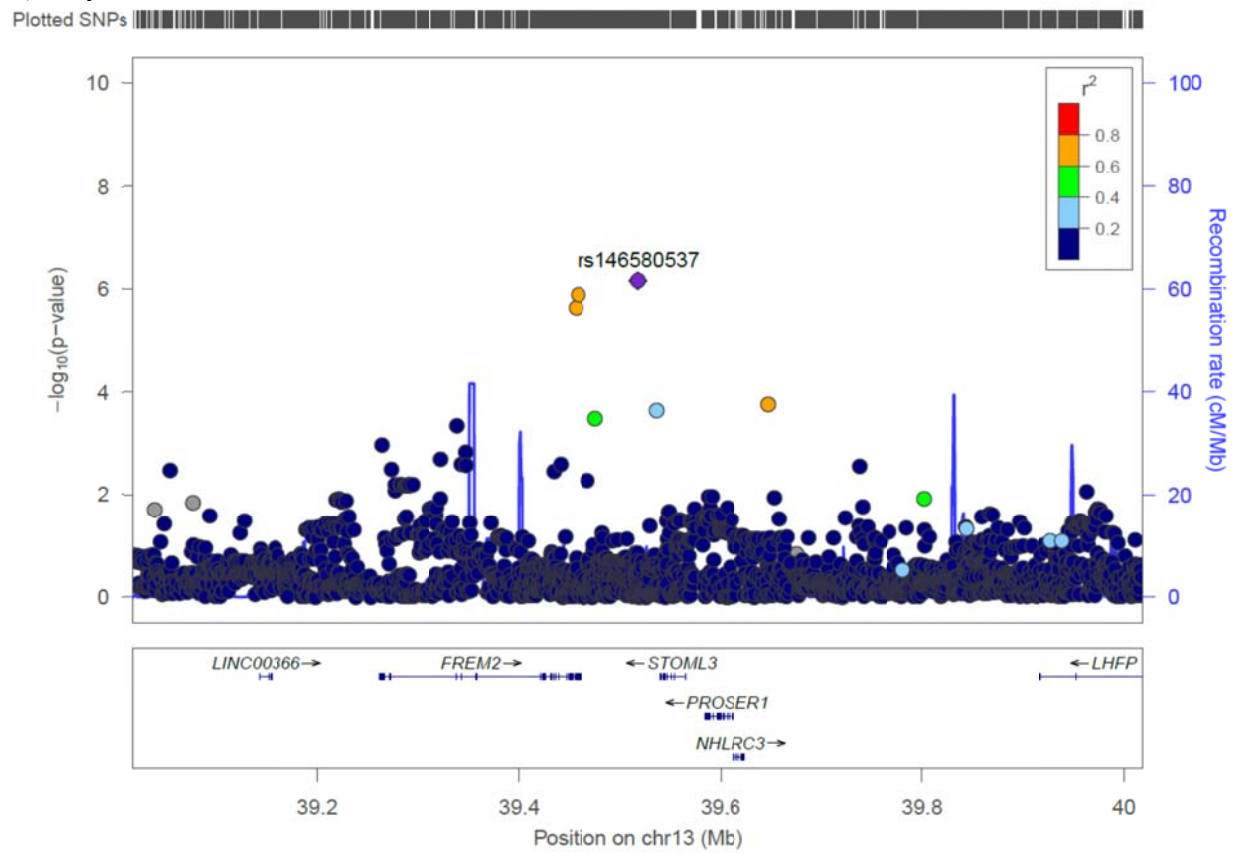

## d) 3q22.3

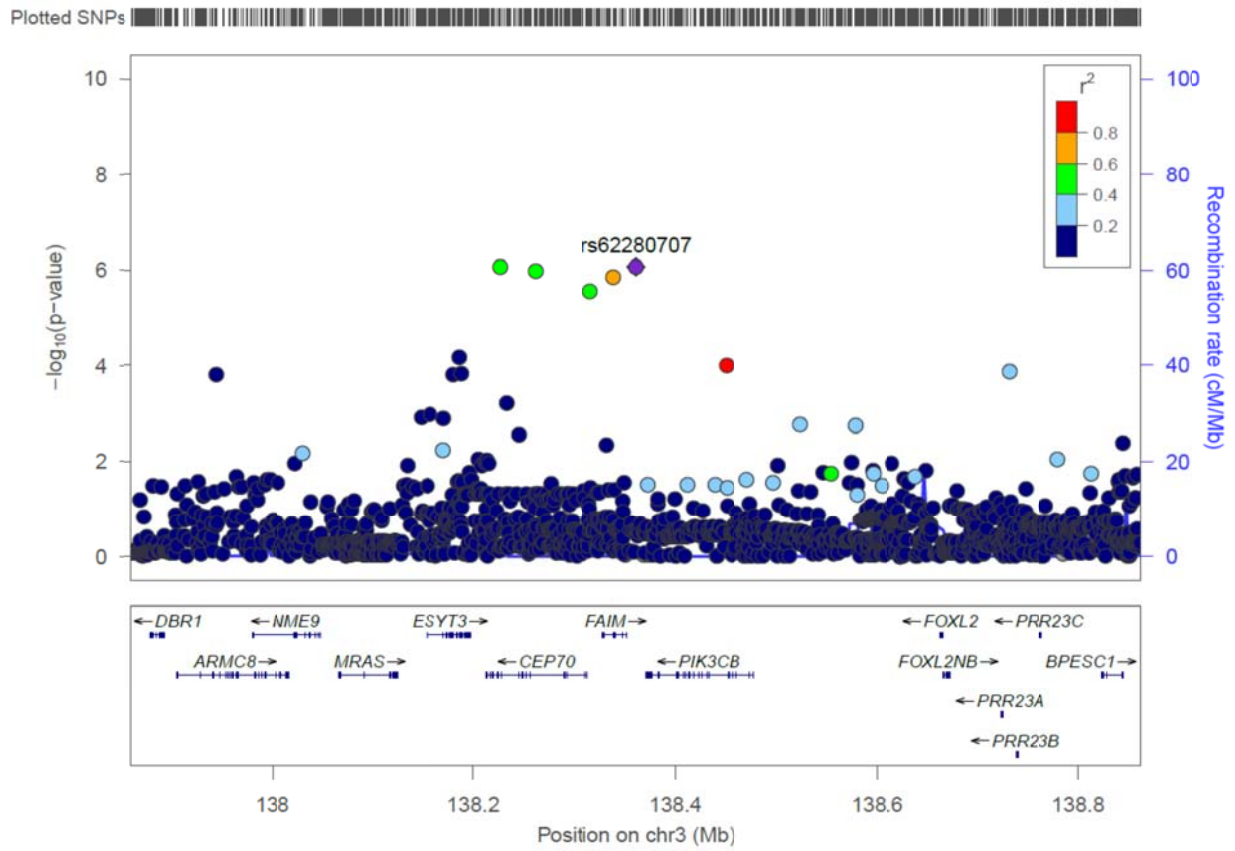

## e) 5q23.2

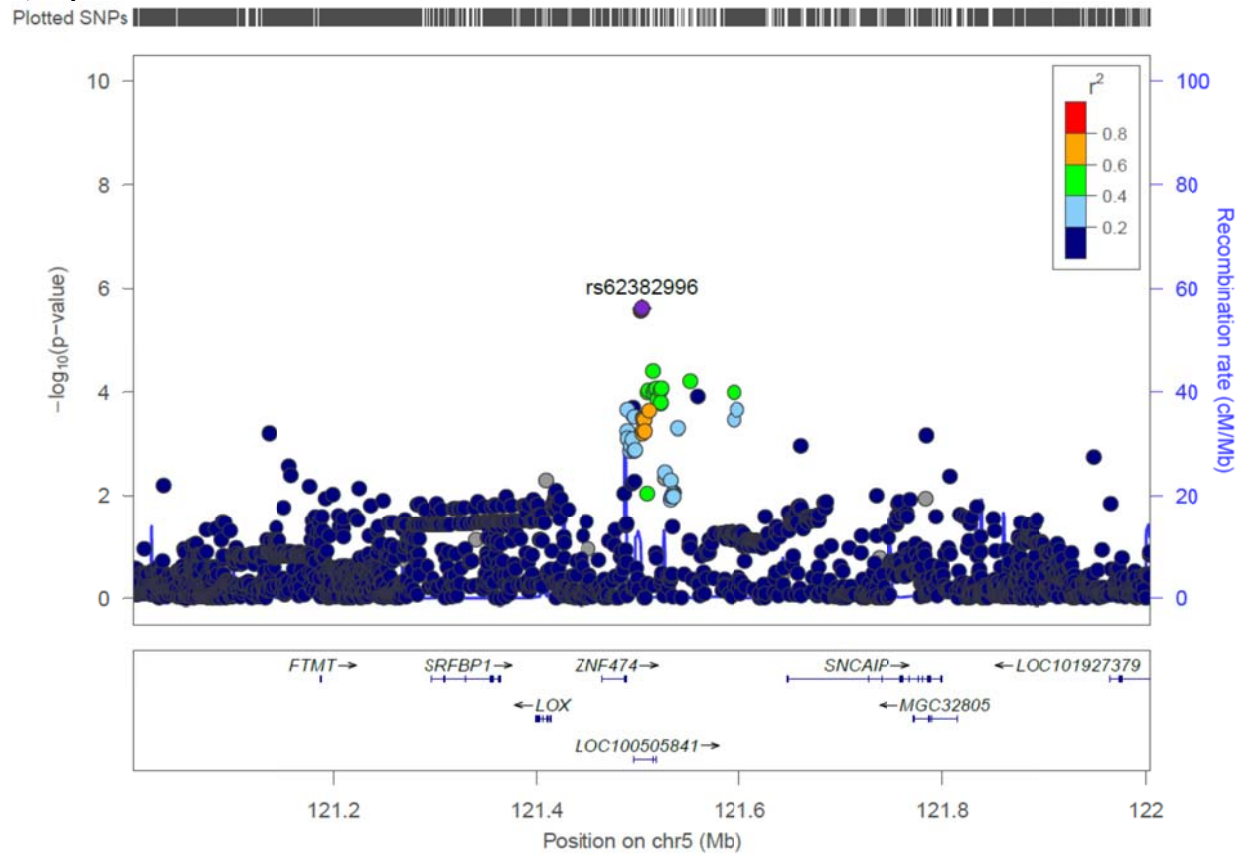

f) 14q12

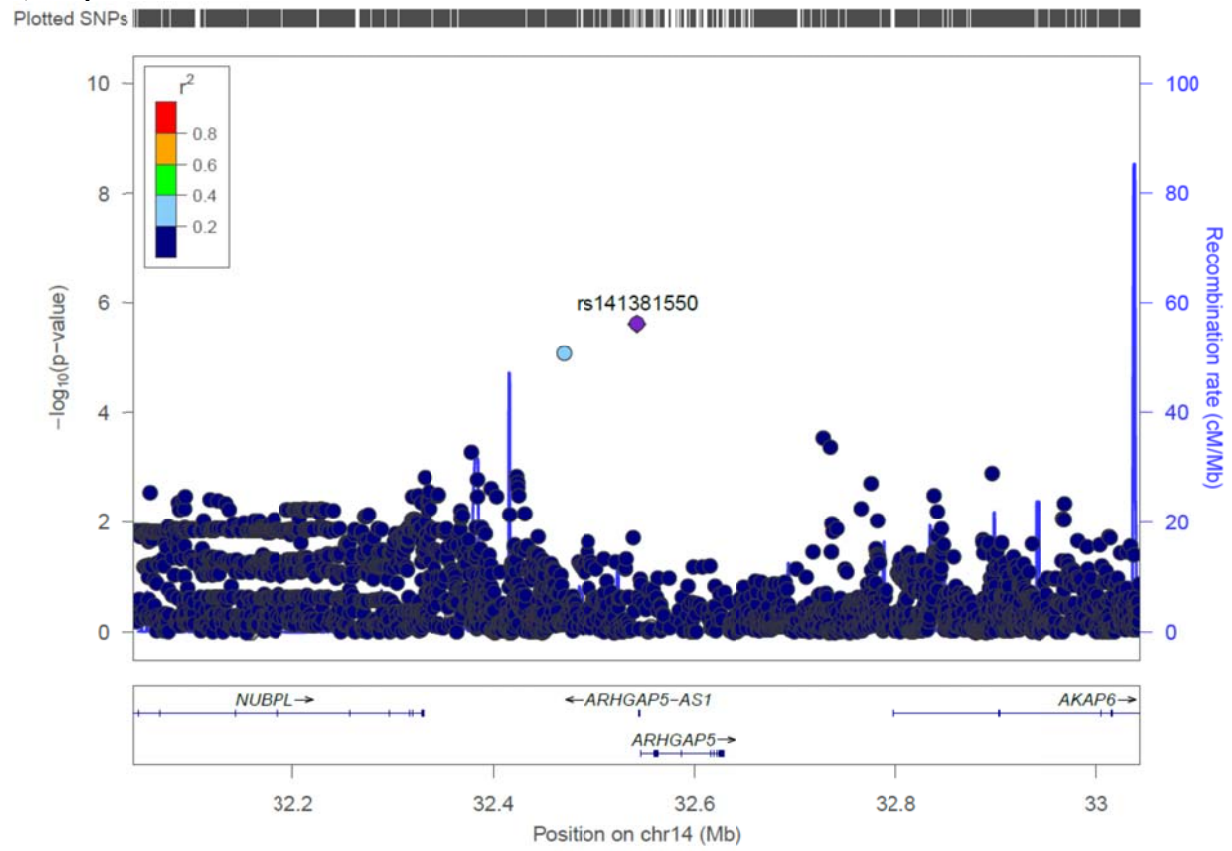

g) 4q22.2

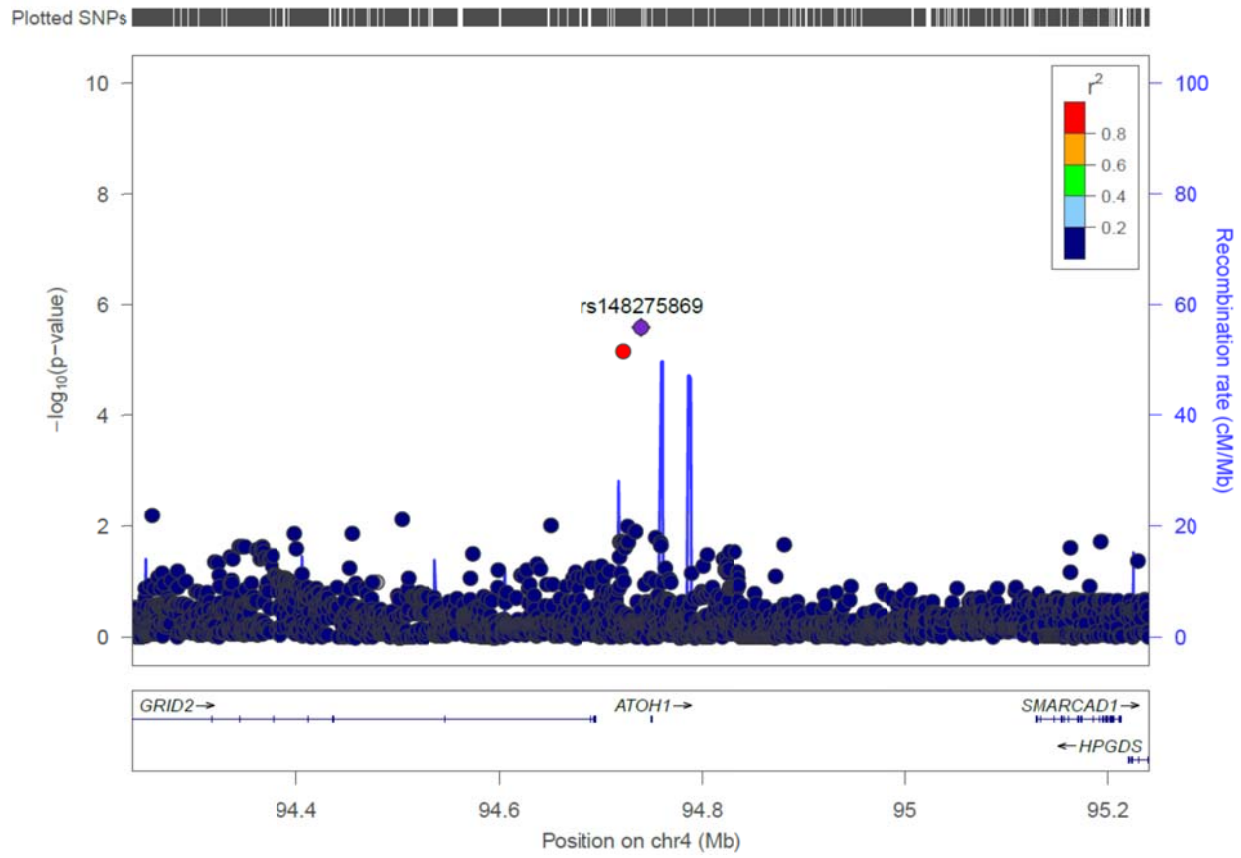

## h) 15q24.2

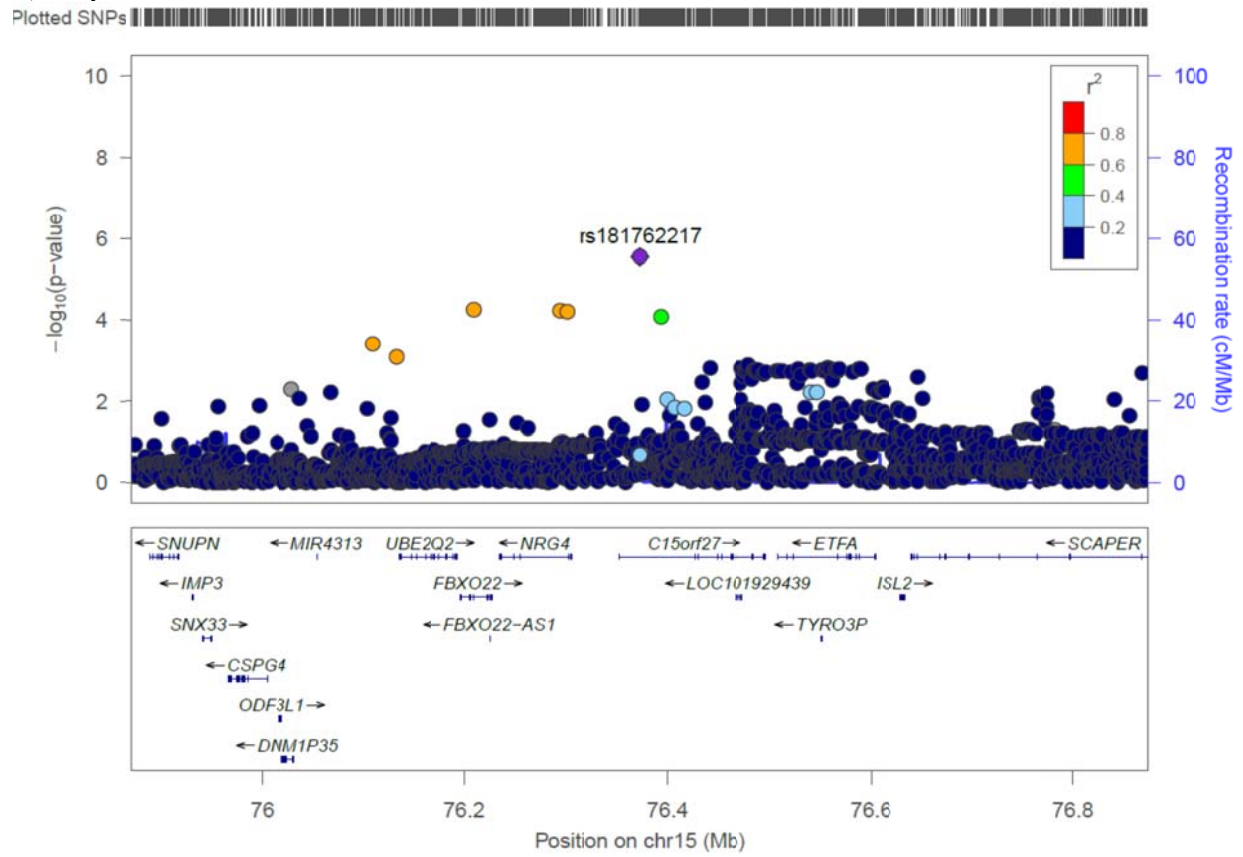

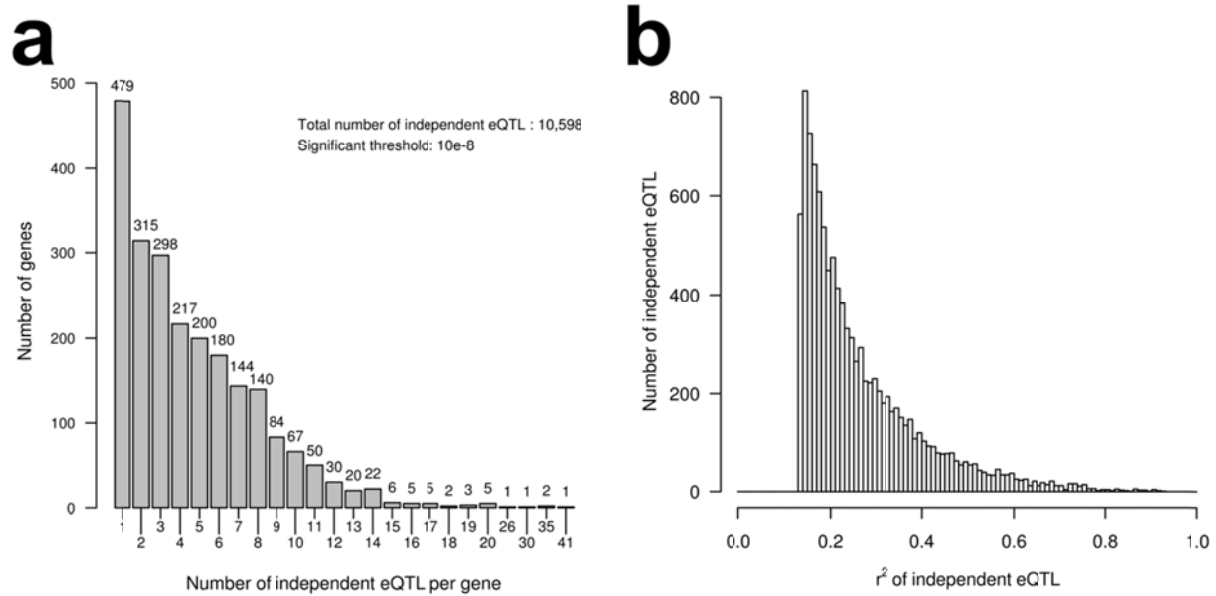

**Supplementary Figure 3.** Independent number and effect sizes of valve eQTL. **(a)** Number of independent eQTL identified. The y axis represents the number of genes/probes and the x axis is the number of independent eQTL per gene/probe, e.g. 479 genes/probes are significantly associated with one SNP; 315 genes/probes are significantly associated with two independent SNPs. **(b)** Distribution of effect sizes of SNPs on gene expression variance among the 10,598 significant and independent eQTL.

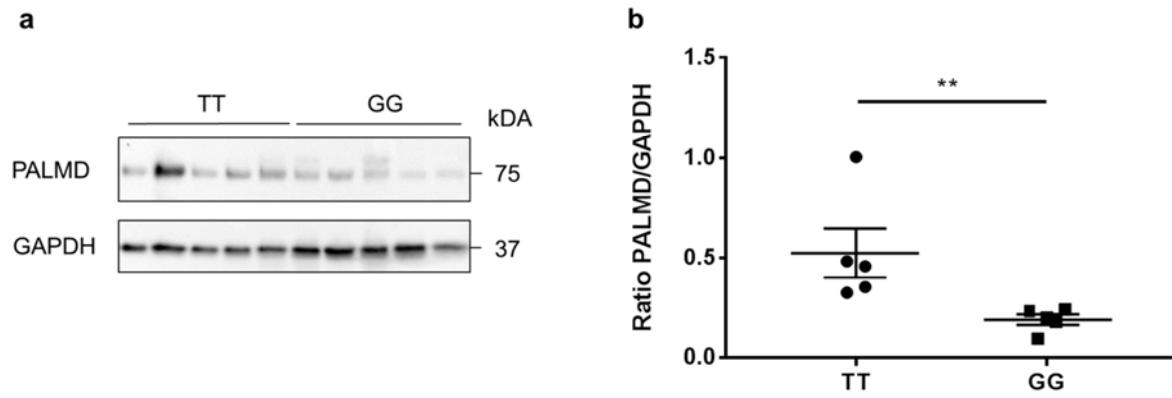

**Supplementary Figure 4.** Protein expression of PALMD by Western blot in human aortic valves. **(a)** Five homozygotes *TT* and five homozygotes *GG* for SNP rs6702619 were evaluated by Western blot normalized to expression of GAPDH. **(b)** The ratio PALMD/GAPDH is illustrated for each patient by genotyping groups. \*\* $p < 0.01$



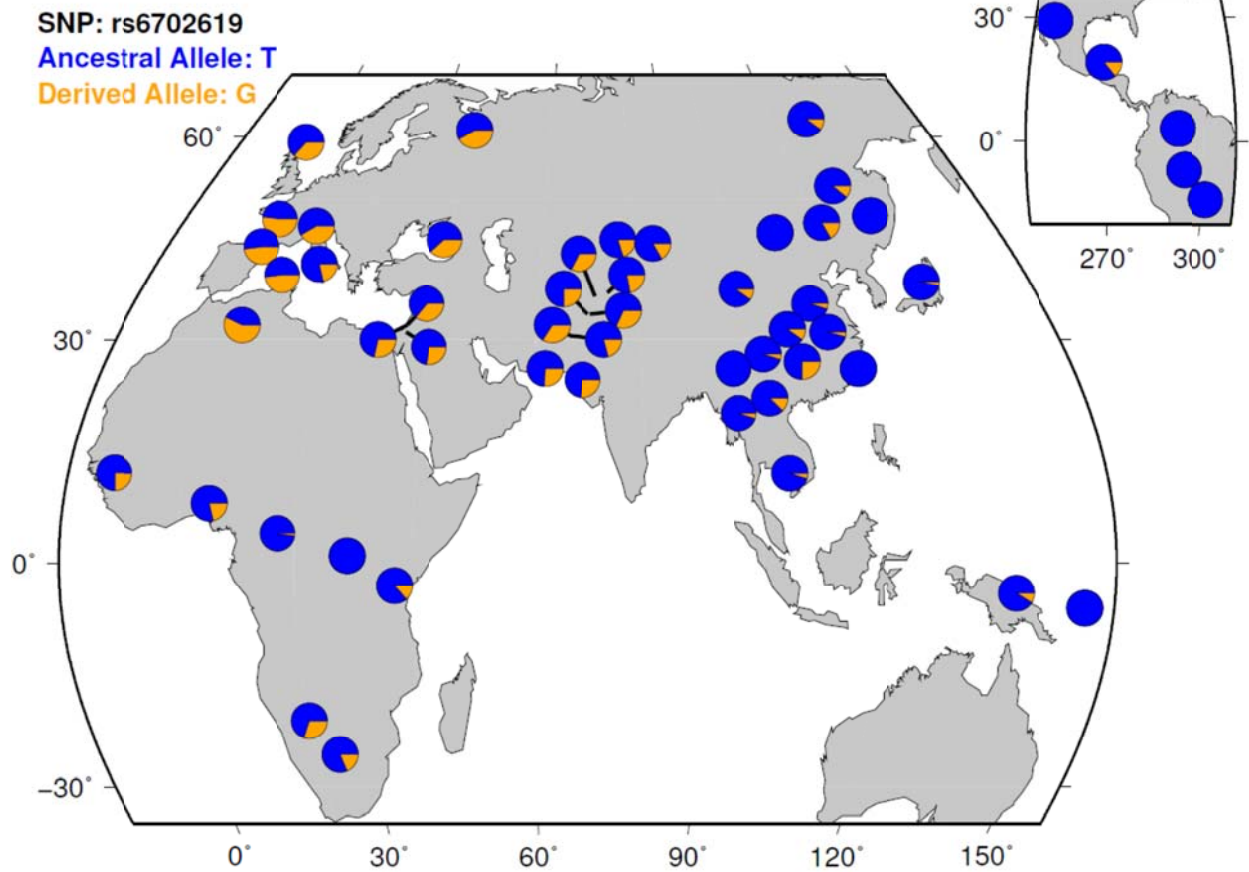

**Supplemental Figure 5.** rs6702619 global allele frequencies. The “G” (gold) allele at rs6702619 is present at higher frequency in European populations, as compared with the “T” (blue) allele. This figure was generated using the Human Genome Diversity Project Selection Browser<sup>1</sup>.

## References

1. Pickrell JK, *et al.* Signals of recent positive selection in a worldwide sample of human populations. *Genome Res* **19**, 826-837 (2009).
