# Supplementary material for: A transcriptome-wide association study identifies PALMD as a susceptibility gene for calcific aortic valve stenosis
Source: PubMed Central journal article supplement (PMC5840407; doi:10.1038/s41467-018-03260-6), 2018-03-07
Supplement: 41467_2018_3260_MOESM3_ESM.pdf [file 41467_2018_3260_MOESM3_ESM.pdf]

## Description of Additional Supplementary Files

File Name: Supplementary Data 1

Description: The 10,598 independent aortic valve eQTL ( $P_{eQTL} < 1 \times 10^{-8}$ ) identified in this study.
